# Supplementary material for: Identification of Genes Preferentially Expressed in Stomatal Guard Cells of Arabidopsis thaliana and Involvement of the Aluminum-Activated Malate Transporter 6 Vacuolar Malate Channel in Stomatal Opening
Source: Frontiers journal article supplement (doi:10.3389/fpls.2021.744991), 2021-10-08
Supplement: Data_Sheet_1.pdf [file Data_Sheet_1.pdf]

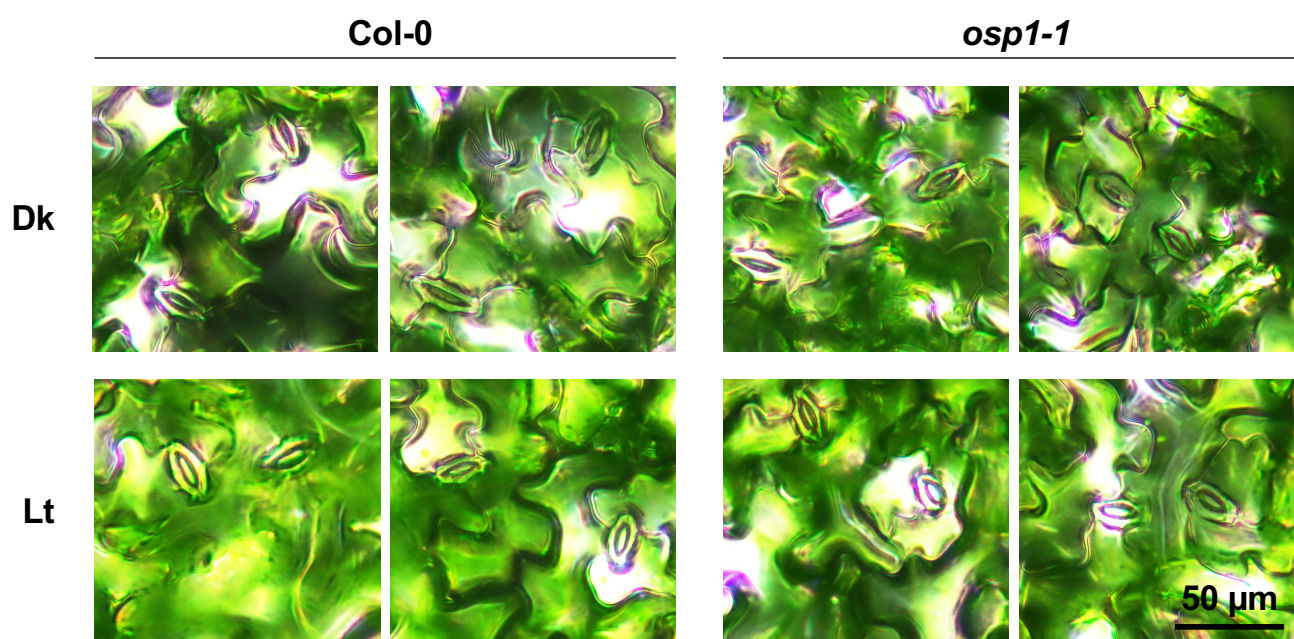

**SUPPLEMENTARY FIGURE 1. Pictures of typical stomata from Col-0 and *osp1-1* mutant in leaf discs.** Dk, dark treatment for 3 hr; Lt, light treatment for 3 hr (RL, 50  $\mu\text{mol m}^{-2} \text{s}^{-1}$ ; BL, 10  $\mu\text{mol m}^{-2} \text{s}^{-1}$ ). The other conditions are those in **Figure 3B**.
