# Supplementary material for: Identification of Genes Preferentially Expressed in Stomatal Guard Cells of Arabidopsis thaliana and Involvement of the Aluminum-Activated Malate Transporter 6 Vacuolar Malate Channel in Stomatal Opening
Source: Frontiers journal article supplement (doi:10.3389/fpls.2021.744991), 2021-10-08
Supplement: Data_Sheet_2.pdf [file Data_Sheet_2.pdf]

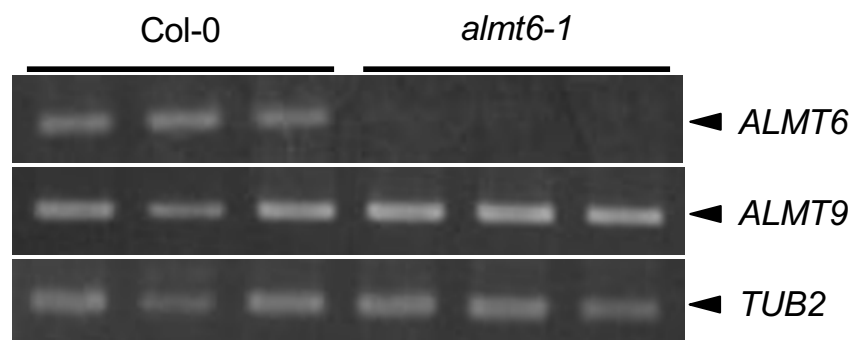

**SUPPLEMENTARY FIGURE 2.** Transcript levels of *ALMT6* and *ALMT9* in guard cell-enriched epidermal strips of *Col-0* and *almt6-1*. Tubulin served as the control. Results of three independent experiments were shown.
