# Supplementary material for: Identification of Genes Preferentially Expressed in Stomatal Guard Cells of Arabidopsis thaliana and Involvement of the Aluminum-Activated Malate Transporter 6 Vacuolar Malate Channel in Stomatal Opening
Source: Frontiers journal article supplement (doi:10.3389/fpls.2021.744991), 2021-10-08
Supplement: Data_Sheet_3.pdf [file Data_Sheet_3.pdf]

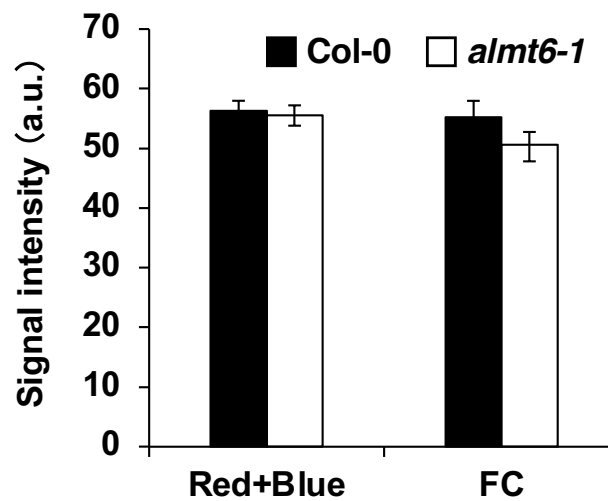

**SUPPLEMENTARY FIGURE 3. Immunohistochemical detection of amount of PM H<sup>+</sup>-ATPase in Col-0 and *almt6-1* guard cells.** GC fluorescence was quantified using an anti-PM H<sup>+</sup>-ATPase antibody and Alexa Fluor 488-conjugated secondary antibody as described in the Materials and Methods. Bars: Averages from three independent experiments. Error bars: SDs (n=3). a.u., arbitrary units.
